# Supplementary material for: Nano-Hybrid Ag@LCCs Systems with Potential Wound-Healing Properties
Source: MDPI journal article supplement (doi:10.3390/ma16062435), 2023-03-18
Supplement: s1 [file s1]

# Supplementary Materials: Nano-hybrid Ag@LCCs systems with potential wound-healing properties

Carmelo Corsaro<sup>1</sup>, Marcello Condorelli<sup>2</sup>, Antonio Speciale<sup>3</sup>, Francesco Cimino<sup>3</sup>, Giuseppe Forte<sup>2</sup>, Francesco Barreca<sup>1</sup>, Salvatore Spadaro<sup>1</sup>, Claudia Muscarà<sup>3</sup>, Manuela D'Arrigo<sup>3</sup>, Giovanni Toscano<sup>3</sup>, Luisa D'Urso<sup>2</sup>, Giuseppe Compagnini<sup>2</sup>, Fortunato Neri<sup>1</sup>, Antonina Saija<sup>3\*</sup>, and Enza Fazio<sup>1\*</sup>

**Table S1.** Carbon-Carbon lengths (Å) for Ag@C<sub>2n</sub>-H, 3 ≤ n ≤ 6 with reference to Figure 2 of the main paper.

|                                  | Ag@C <sub>12</sub> -H | Ag@C <sub>10</sub> -H | Ag@C <sub>8</sub> -H | Ag@C <sub>6</sub> -H |
|----------------------------------|-----------------------|-----------------------|----------------------|----------------------|
| C <sub>1</sub> -C <sub>2</sub>   | 1.24                  | 1.24                  | 1.24                 | 1.24                 |
| C <sub>2</sub> -C <sub>3</sub>   | 1.37                  | 1.37                  | 1.37                 | 1.37                 |
| C <sub>3</sub> -C <sub>4</sub>   | 1.22                  | 1.22                  | 1.21                 | 1.21                 |
| C <sub>4</sub> -C <sub>5</sub>   | 1.36                  | 1.36                  | 1.36                 | 1.37                 |
| C <sub>5</sub> -C <sub>6</sub>   | 1.22                  | 1.22                  | 1.21                 | 1.20                 |
| C <sub>6</sub> -C <sub>7</sub>   | 1.35                  | 1.36                  | 1.37                 |                      |
| C <sub>7</sub> -C <sub>8</sub>   | 1.22                  | 1.21                  | 1.20                 |                      |
| C <sub>8</sub> -C <sub>9</sub>   | 1.36                  | 1.37                  |                      |                      |
| C <sub>9</sub> -C <sub>10</sub>  | 1.21                  | 1.20                  |                      |                      |
| C <sub>10</sub> -C <sub>11</sub> | 1.37                  |                       |                      |                      |
| C <sub>11</sub> -C <sub>12</sub> | 1.21                  |                       |                      |                      |

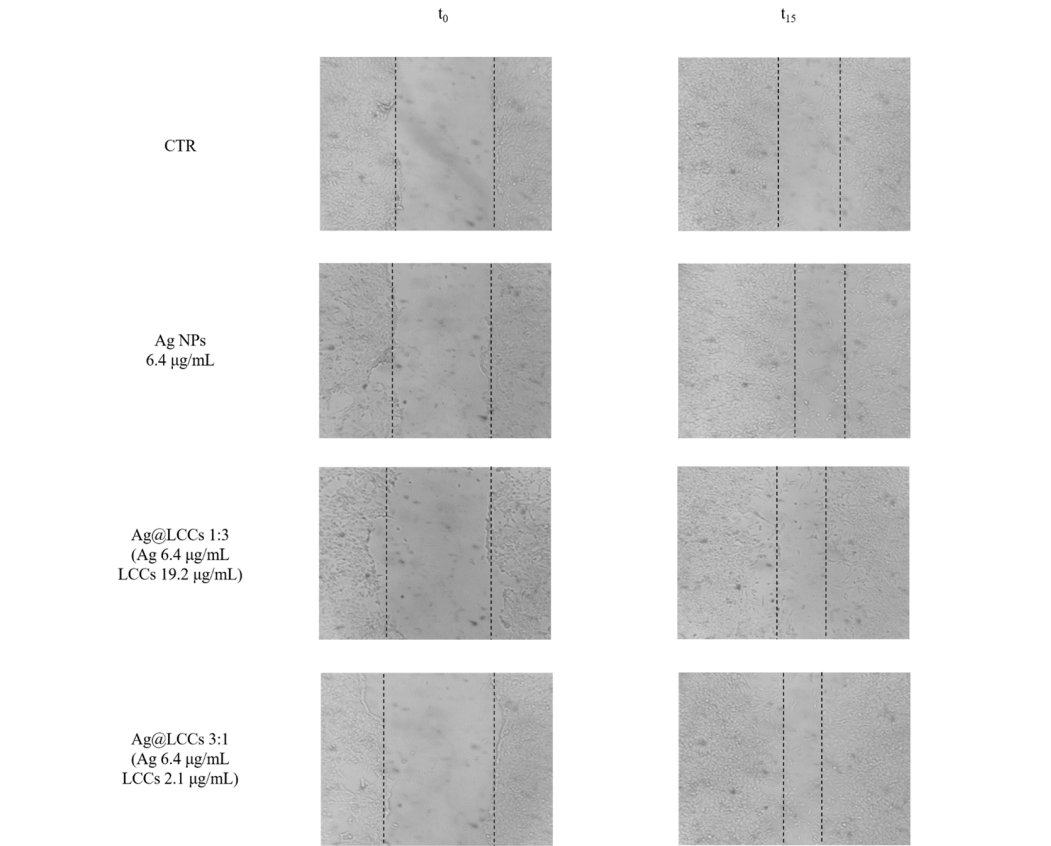

**Figure S1.** Effects on in vitro scratch closure. Representative images of the scratches photographed at  $t_0$  and 15 hrs for CTR, Ag NPs and Ag@LCCs dispersions at the higher tested concentrations (6.4 µg/mL expressed as Ag).
